# Supplementary material for: Transcriptome Profiling Reveals Transcriptional Regulation by DNA Methyltransferase Inhibitor 5-Aza-2′-Deoxycytidine Enhancing Red Pigmentation in Bagged “Granny Smith” Apples (Malus domestica)
Source: PubMed Central journal article supplement (PMC6213223; doi:10.3390/ijms19103133), 2018-10-12
Supplement: ijms-19-03133-s001.pdf [file ijms-19-03133-s001.pdf]

# Supplementary Materials: Transcriptome Profiling Reveals Transcriptional Regulation by DNA Methyltransferase Inhibitor 5-Aza-2'-Deoxycytidine Enhancing Red Pigmentation in Bagged “Granny Smith” Apples (*Malus domestica*)

Changqing Ma, Bowen Liang, Bo Chang, Li Liu, Jiuying Yan, Yazhou Yang and Zhengyang Zhao

Table S1. Primers used for quantitative real-time PCR in this work.

| Gene ID       | Name  | Sense Primer (5'–3')  | Anti-Sense Primer (5'–3') |
|---------------|-------|-----------------------|---------------------------|
| LOC 103447714 | ACTIN | CTGAACCCAAAGGCTAATCG  | ACTGGCGTAGAGGGAAAGAA      |
| LOC 103450046 | PAL   | AGGAACACCGTAAAGAACA   | ACATACTCCCTATCGACAAC      |
| LOC 103440278 | DME   | AGAATCCTGGGCTTGCTT    | TCTCCATGCCTACGCTTT        |
| LOC 103444202 | MYB1  | GTCGTCGTCAACAAAGAATGG | GGTCCGTGCTAAAGGAGAAT      |
| LOC 103443513 | CHS   | AGTGACACCCACCTTGATAG  | CTGTCGGGGAGAATGGTTTG      |
| LOC 103437875 | F3H   | CTGCTACTACGCTGACATCC  | AATACCCCAGTCCTCACAAG      |
| LOC 103450464 | DFR   | ATTTATCTTTACGAGCATCC  | CCCTATCTCCCTCAACTTCT      |
| LOC 103437326 | LDOX  | GTTCCAAATTCATCGTCAT   | TCACCTTTTCCTTGTTACCC      |
| LOC 103406603 | WD40  | AGAGCGGAGAACTCGGTGAC  | CGATTCGGTGGTGCTGGTG       |
| LOC 103454421 | CHI   | GTTACAGGTCCGTTTGAGAA  | AACTTTTCAATGGCTTTGCCTTCTG |
| LOC 103417897 | UFGT  | TCGTAGCCTTCCCTTTCCT   | TTATCAATGCTGTTGTTGGAAAAGA |
| LOC 103404319 | DRM   | GAGCAAACCAACCAGAG     | ATCAAATCCGCCAAACT         |
| LOC 103449479 | MET   | CGGAATAAGGGTGCTGAC    | AGATACTCCTGGGAACGA        |
| LOC 103425233 | ROS   | CGCATGAGCCAATTTAGGAC  | CAAGAAGGTAAGGGCAGGGA      |

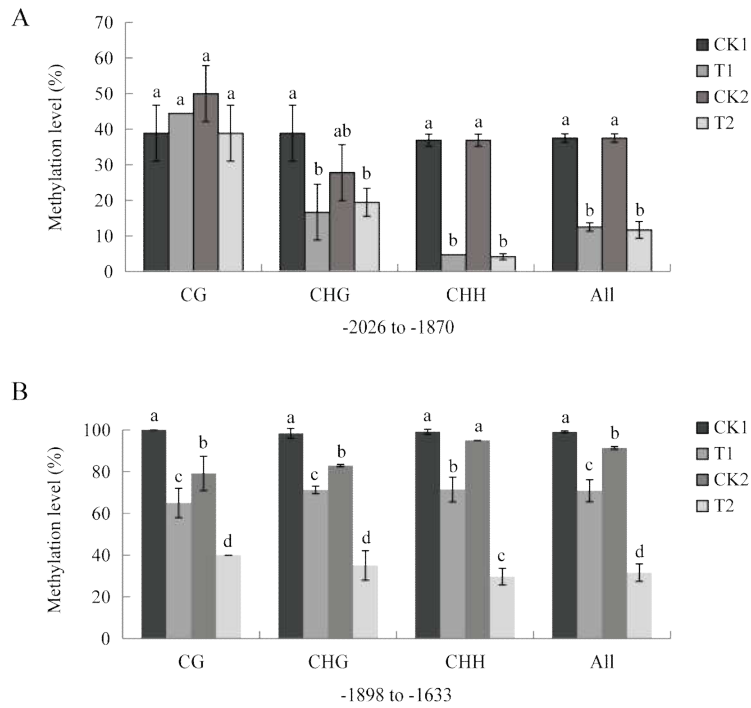

**Figure S1.** Bisulfite sequencing analysis of cytosine methylation levels in the *MYB* promoter in bagged “Granny Smith” apple skins of 5-aza-dC-treated and control fruits. The charts show the methylation levels of different cytosine types in the -2026 to -1870 (**A**) and -1898 to -1633 (**B**) regions. Twenty independent clones from each PCR were sequenced and analyzed using the Kismeth software. In the *x*-axis, “All” refers to overall methylated cytosines, while CG, CHG, and CHH refer to the three different types, in which H represents A, C, or T nucleotides. Different lower case letters indicate significant differences by Tukey’s multiple range test ( $p < 0.05$ ).
